# Supplementary material
Source: PubMed Central journal article supplement (PMC2689982)
Supplement: pp.109.139394_1.pdf [file pp.109.139394_1.pdf]

|         |     |                                                               |     |
|---------|-----|---------------------------------------------------------------|-----|
| NnAOX1a | 1   | MMNSK-LAALLLKQLGSATVIRIVTMG---PLNG-----ITTESSCFLHAS           | 41  |
| NnAOX1b | 1   | MMKSGKMGVPI.TMQIAPRI.FSTATTS---RI.VTSEP--I.I.TGTTSTFLYAA      | 45  |
| AtAOX1a | 1   | MMITRGGAKAAKSLLVAAAGPRLFSTV---RTVSSHE--ALSASHILKPGV           | 45  |
| LeAOX1a | 1   | MMTRG-ATRMTRVVMGHMGPRYFSTTVLRNNPGTGVVGGVAAGLLHGLPA            | 49  |
| LeAOX1b | 1   | MNRNAAM-KISGLLM-----RQLRGEFLPRGGM---VQIR--                    | 31  |
| NtAOX1  | 1   | MMTRG-ATRMTRTVLGHMGPRYFSTAI.FRNDAGTGVMSGAAVF-MHGVP            | 48  |
| VuAOX1  | 1   | MMMSRSCGN-----RVANAV---MLVAK----GLSCE-----V                   | 26  |
|         |     |                                                               |     |
| NnAOX1a | 42  | GPVVPGRRTWIRFSCV-LGV--RNGSTSALNNKEEKEKGVRTSSTVGGANR           | 88  |
| NnAOX1b | 46  | AARTSVAS--IRLPVL-GV--RNGSTGALGGDEQTRNGLQTDSTGGTSDS            | 90  |
| AtAOX1a | 46  | TSAWI-----WTRAPT-I-G-GMRFASITITLGEKTPMKEEDANQKKTENEST         | 89  |
| LeAOX1a | 50  | NPSKFAVAVTWRHFSAMGS--RSASTAALNDKQOEKESDCKKVENTATAT            | 97  |
| LcAOX1b | 32  | ---II-----WS-----N---MNTSSKTKEEQKTIHQPSIITDA                  | 57  |
| NtAOX1  | 49  | NPSEKAVVTWVRHFPVMGS--RSAMSMALNDKQHDK----K-AENGSA              | 91  |
| VuAOX1  | 27  | GGA-----RAF-Y-GGGVRSSESTL.VI.PEKEKMEK-----KVGDG--             | 58  |
|         |     |                                                               |     |
| NnAOX1a | 89  | PEDKMI-----V-SYWGMPANLTKKDGSEWKWNSFRPWETYKADLS                | 129 |
| NnAOX1b | 91  | PSDKPKPI-----V-SYWGLVPSKVTKEDGTVWRWNSFRPWETYQADLS             | 133 |
| AtAOX1a | 90  | CGDAACGNKGDGKIASYWGVEPNKIKEDGSEWKWNSFRPWETYKADIT              | 139 |
| LeAOX1a | 98  | AAVNG-GVG---KSVVSYWGVFPPSKATKPDGTEWKWNSFRPWETYADMS            | 143 |
| LeAOX1b | 58  | TNAAG-DKAK--KTV-SYWGVDPKTSKEDGTPWKWNSFRPWETYADTS              | 103 |
| NtAOX1  | 92  | TGGDGGDE---KSVVSYWGVQPSKVIKEDGTEWKWNSFRPWETYKADLS             | 138 |
| VuAOX1  | 59  | -----GNKFKQ-KGTVSYWGVFPPSKITKIDGTEWKWNSFRPWETYKADVS           | 101 |
| *       |     |                                                               |     |
| NnAOX1a | 130 | IDLKKHHSVPTFMDKLAYWTVKALRYPTDILFQNRVYCCRAMLETVAAVP            | 179 |
| NnAOX1b | 134 | IDLKKHHEPNKFLDKMAYWTVKTLRYPTDLEFQRRYCCRAMLETVAAVP             | 183 |
| AlAOX1a | 140 | IDLKKHHPVPTFLDRIAYWTVKSLRWPTDLEFQRRYCCRAMLETVAAVP             | 189 |
| LeAOX1a | 144 | IDLTKHHAPVTFLDKFAWTVKILRFPTDVFQRRYCCRAMLETVAAVP               | 193 |
| LeAOX1b | 104 | IDVFKHHMPTNFMDKFAWTVQSLKYPTYL.FQRRHMCNAMLETVAAVP              | 153 |
| NtAOX1  | 139 | IDLTKHHAPTFLDKFAWTVKSLRYPTDLEFQRRYCCRAMLETVAAVP               | 188 |
| VuAOX1  | 102 | IDLNKHHAPTFLDKMAI.WTVKTLRYPTDLEFQRRYCCRAMLETVAAVP             | 151 |
| * =     |     |                                                               |     |
| NnAOX1a | 180 | GMVGGMLLHCKSLRRFEHSGGWIKTLLLEAENERMHLMTFMEVSPKWYE             | 229 |
| NnAOX1b | 184 | GMVAGMLLHCKSLRRFEHSGGWIKALLEEAENERMHLMTFMEVSPKWYE             | 233 |
| AlAOX1a | 190 | GMVGGMLLHCKSLRRFEQSGGWIKALLEEAENERMHLMTFMEVAKPKWYE            | 239 |
| LeAOX1a | 194 | GMVGGMLLHCKSLRRFEQSGGWIKALLEEAENERMHLMTFMEVAKPNVYE            | 243 |
| LeAOX1b | 154 | GMVGGMLLHCKSLRRFEHSGGWIKALLEEAENERMHLMTFI.ELSNPKWYE           | 203 |
| NtAOX1  | 189 | GMVGGMLLHCKSLRRFEQSGGWIKTLLLEAENERMHLMTFMEVAKPNWYE            | 238 |
| VuAOX1  | 152 | GMVAGMLLHCKSLRRFEHSGGWIKALLEEAENERMHLMTFMEVAKPKWYE            | 201 |
| = =     |     |                                                               |     |
| NnAOX1a | 230 | RALVAVQGVFFNTYFLGYLISPRFAHRVGYLEEEA.IHSYTEFLKELDK             | 279 |
| NnAOX1b | 234 | RALVETVQGVFFNAYFLAYLISPKLAHRVGYLEEEA.IHSYTEFLKELDK            | 283 |
| AtAOX1a | 240 | RALVITVQGVFFNAYFLGYLISPKFAHRVGYLEEEA.IHSYTEFLKELDK            | 289 |
| LeAOX1a | 244 | RALVFAVQGVFFNAYFAAYLISPKLAHRVGYLEEEA.VHSYTEFLKELDN            | 293 |
| LeAOX1b | 204 | RALVFAVQGVFFNAYFIAYLISP.KLAHRVGYLEEEA.VNSYTEFLIDIEK           | 253 |
| NtAOX1  | 239 | RALVFAVQGVFFNAYFVTYLLSP.KLAHRVGYLEEEA.IHSYTEFLKELDK           | 288 |
| VuAOX1  | 202 | RALVITVQGVFFNAYFLGYMISP.KFAHRVGYLEEEA.IHSYTEFLKELDK           | 251 |
| =       |     |                                                               |     |
| NnAOX1a | 280 | GNTQNV.PAPAIAVDYWQLP.DS.TL.RDVVMV.VRADEA.HHRD.VNH.FASDI.HD    | 329 |
| NnAOX1b | 284 | GNIEN.V.PAPAIAIDYWILP.DS.TL.RDVVL.V.VRADEA.HHRD.VNH.FASDI.HF  | 333 |
| AtAOX1a | 290 | GNIEN.V.PAPAIAIDYWR.LPADATL.RDVVMV.VRADEA.HHRD.VNH.FASDI.HY   | 339 |
| LeAOX1a | 294 | GNTFN.V.PAPAIAIDYWR.LPKDATL.RDVVI.V.VRADEA.HHRD.VNH.YASDI.HY  | 343 |
| LeAOX1b | 254 | GLEFN.V.PAPAIAIDYWR.LPADATL.RDVVT.V.VRADEA.HHRD.LNH.FASDI.QC  | 303 |
| NtAOX1  | 289 | GNTFN.V.PAPAIAIDYCR.LPKDSTL.I.DVVT.V.VRADEA.HHRD.VNH.FASDI.HY | 338 |
| VuAOX1  | 252 | GNIEN.V.PAPAIAIDYWQLP.DS.TL.RDVVT.V.VRADEA.HHRD.VNH.FASDI.HY  | 301 |
| = =     |     |                                                               |     |
| NnAOX1a | 330 | QGYELKESFAPLGYH                                               | 344 |
| NnAOX1b | 334 | QGQELRET.PAPIGYH                                              | 348 |
| AtAOX1a | 340 | QGRELKEAP.PAPIGYH                                             | 354 |
| LeAOX1a | 344 | QGQQLKDS.PAPIGYH                                              | 358 |
| LeAOX1b | 304 | QGH.LKGY.PAPIGYH                                              | 318 |
| NtAOX1  | 339 | QGQQLKDS.PAPIGYH                                              | 353 |
| VuAOX1  | 302 | QGRELREAA.PAPIGYH                                             | 316 |

**Supplemental Figure S1.** Sequence alignment of NnAOX1a, NnAOX1b and AOX1 proteins from other dicot species. Bold characters highlight residues conserved across all of the AOX sequences in the alignment. The putative structural features are shown as described in the legend of Fig. 3. Abbreviations and data sources: AtAOX1a, *Arabidopsis thaliana* AOX1a (NP\_188876); LeAOX1a, *Lycopersicon esculentum* AOX1a (AAK58482); LeAOX1b, *L. esculentum* AOX1b (AAK58483); NtAOX1, *Nicotiana tabacum* AOX1 (AAC60576); VuAOX1, *Vigna unguiculata* AOX1 (AAZ09196).
